# Supplementary material
Source: PubMed Central journal article supplement (PMC3664994)
Supplement: neo1506_0620SD1.pdf [file neo1506_0620SD1.pdf]

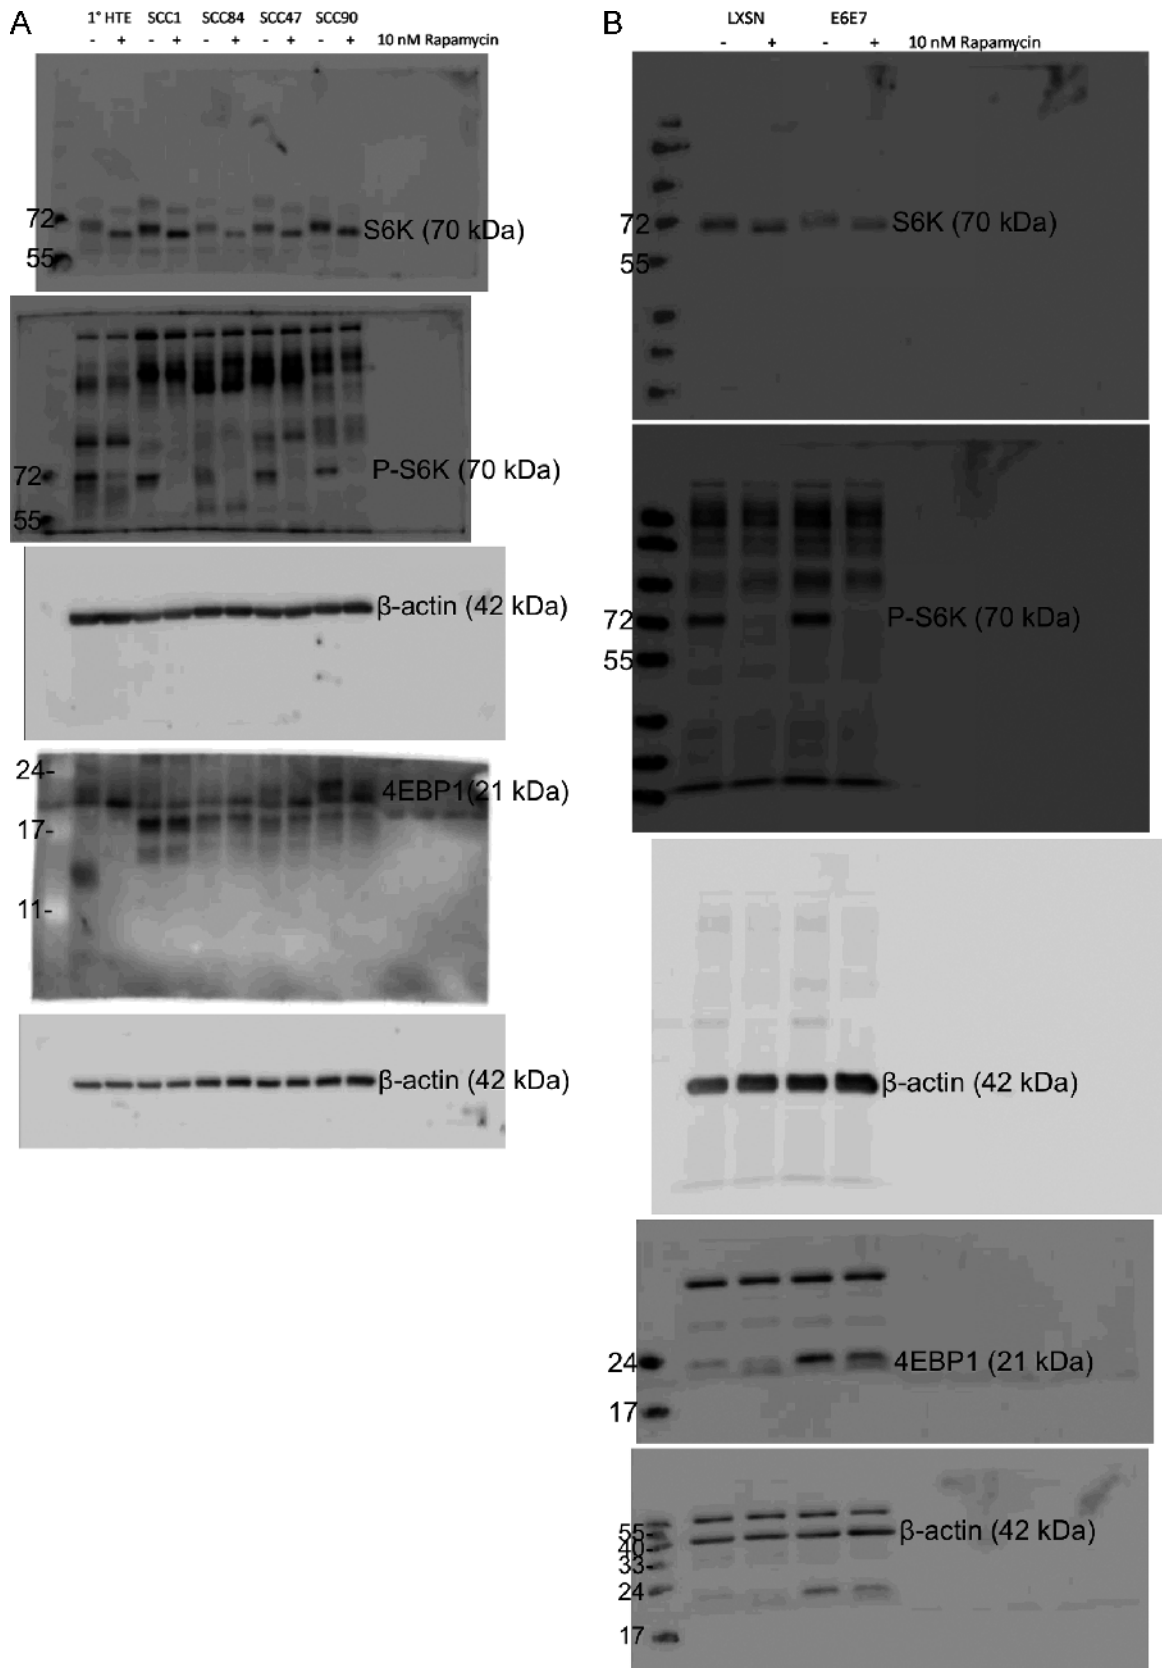

**Figure W1.** Full-length Western blots with size markers of downstream targets of mTOR corresponding to those shown in Figure 1 of the main text. Blots for P-S6K, total S6K, and 4EBP1 are shown.  $\beta$ -Actin is shown as a loading control. (A) Primary HTEs are compared to four tonsillar SCC lines, two HPV- (SCC1 and SCC84) and two HPV+ (SCC47 and SCC90), after 24 hours of treatment with 10 nM rapamycin or vehicle. (B) A retrovirally transduced and immortalized HPV+ mouse oropharyngeal epithelial (MOE) cell line possessing the E6 and E7 oncogenes (E6/E7) is compared to an empty vector containing control line (LXSN).

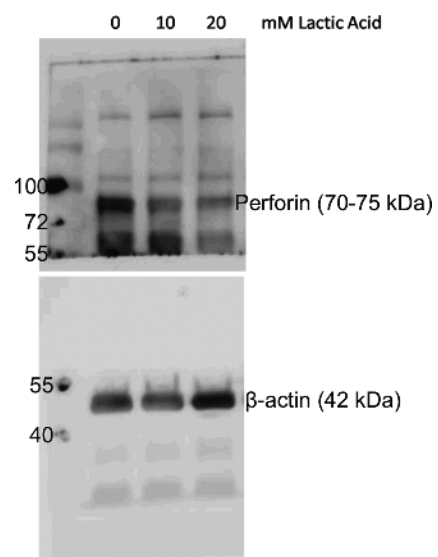

**Figure W2.** Full-length Western blot with size markers of mouse perforin corresponding to the blot shown in Figure 6 of the main text.  $\beta$ -Actin is shown as a loading control. Perforin was blotted from whole-cell lysates of mixed lymphocytes that were cultured for 24 hours at 0, 10, and 20 mM lactic acid in media (RPMI), which were isolated from the spleens of mice vaccinated with Ad5 E6/E7.
